# Supplementary material
Source: Springer Nature journal article supplement (https://www.springermedizin.de/resource/supplementary/12957_2011_925_MOESM2_ESM.pdf/9562134)

FTS

2014/03/04

13 08 05

F21

AVE

1/60

NH

66M

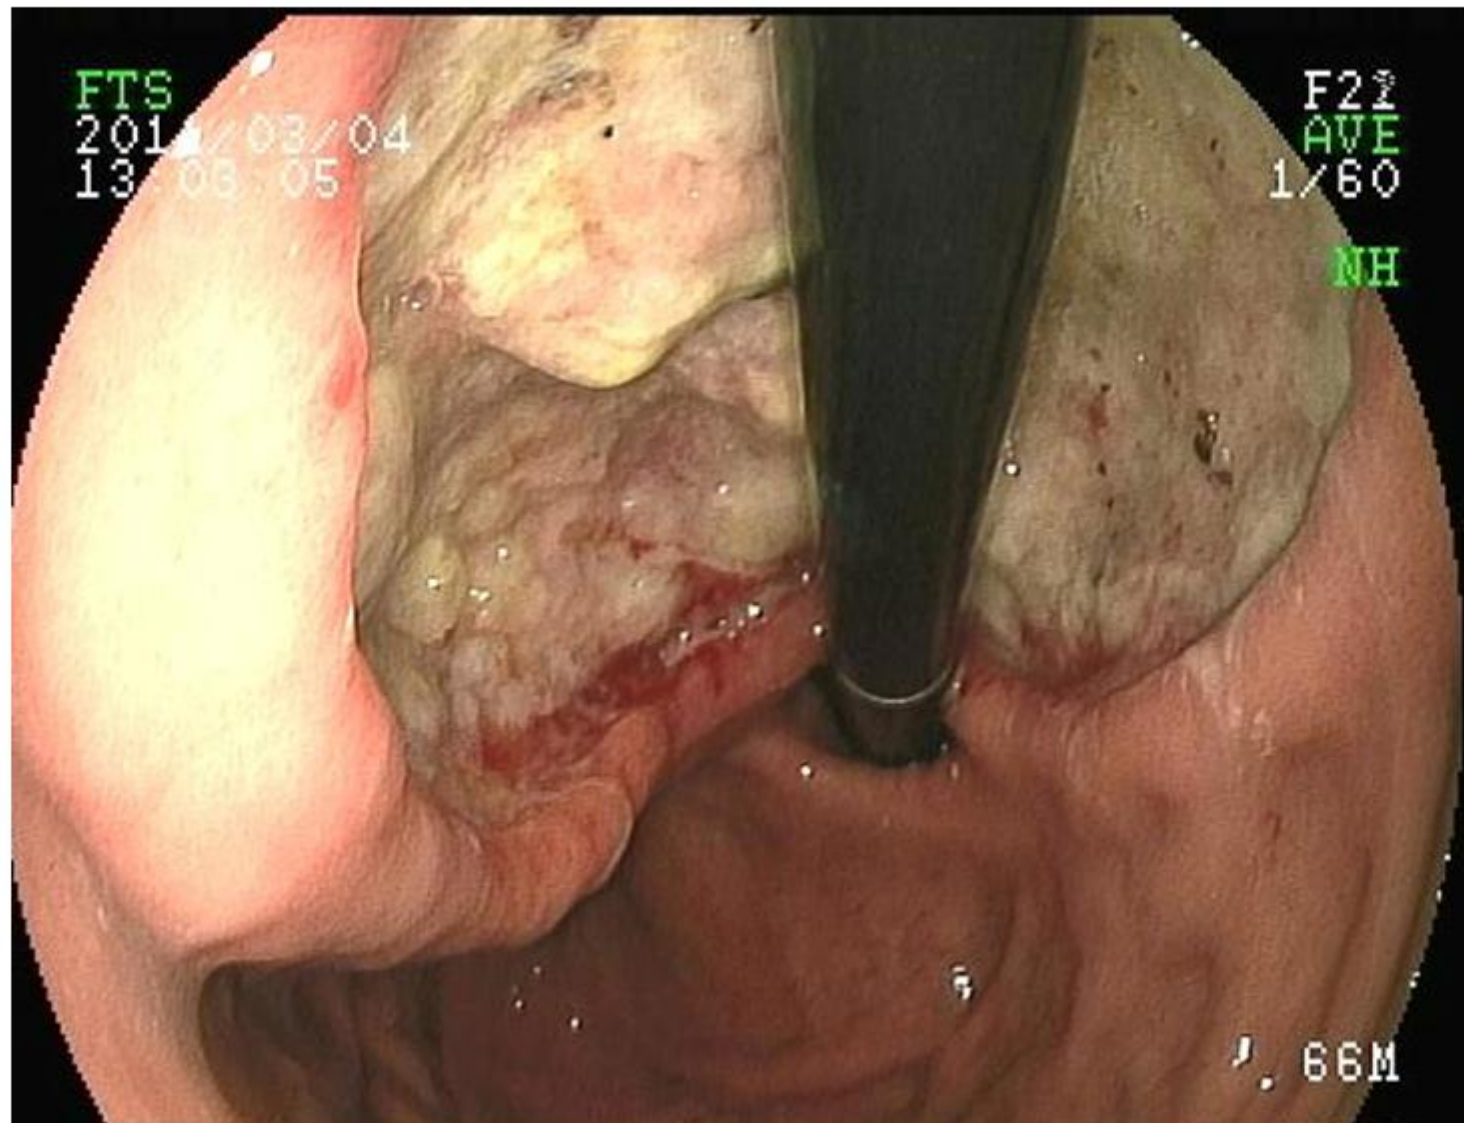

Supplement: MOESM2 [file 9562134]
